# Supplementary material
Source: HighWire-hosted journal article supplement (https://bmjopen.bmj.com/content/10/2/e034863)

## Appendix 1: Hypothesized model of SAQ-S-GE for Confirmatory Factor Analyses

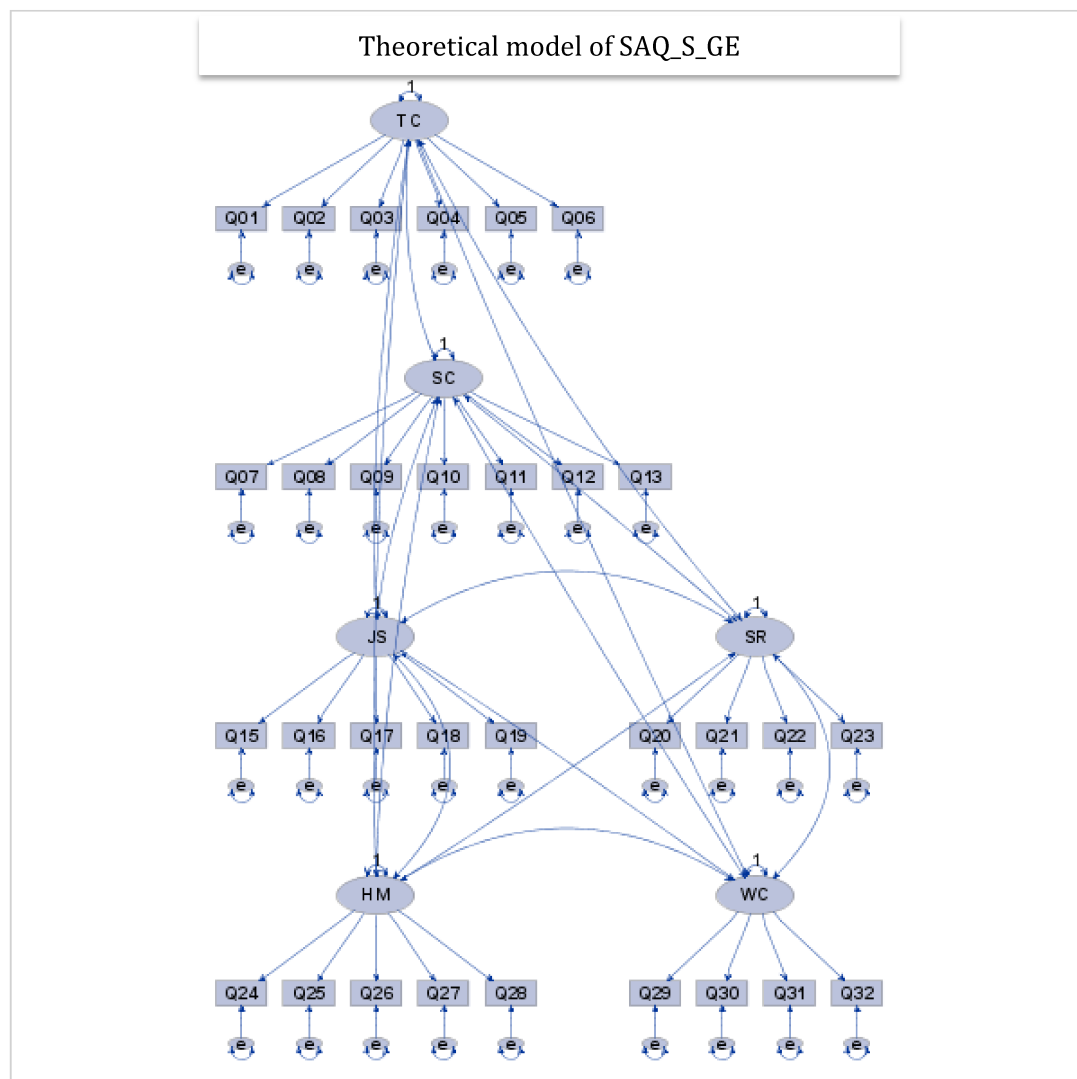

Supplement: inline-supplementary-material-1 [file inline-supplementary-material-1.pdf]
